# Supplementary material for: A pilot study of lymphodepletion intensity for peripheral blood mononuclear cell-derived neoantigen-specific CD8 + T cell therapy in patients with advanced solid tumors
Source: Springer Nature journal article supplement (doi:10.1038/s41467-023-39225-7), 2023-06-10
Supplement: MOESM1 [file 41467_2023_39225_MOESM1_ESM.pdf]

# Supplementary Tables and Figures

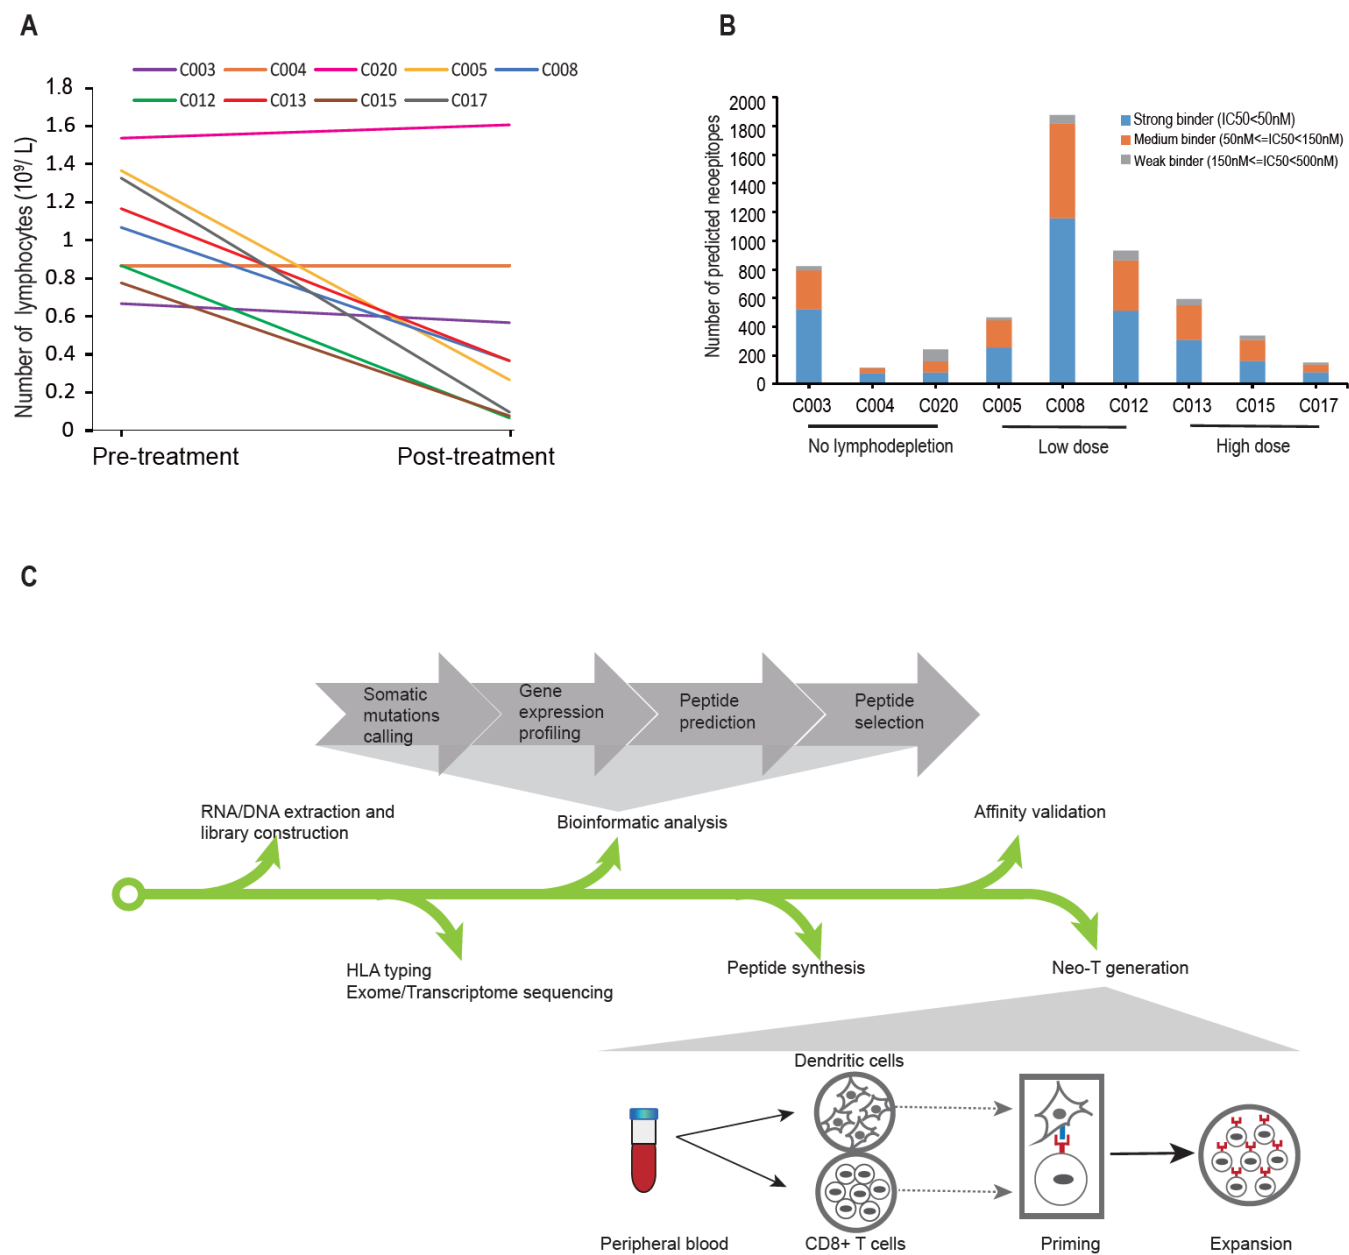

**Figure S1. Features of patients and Neo-T manufacture pipeline.** (A). Lymphocyte counts before and after lymphodepleting treatment. (B) Number and quality of predicted neoepitopes in each patient. (C). Schematic diagram of neoantigen prediction and Neo-T manufacturing pipeline (methods). Source data are provided as a Source Data file.

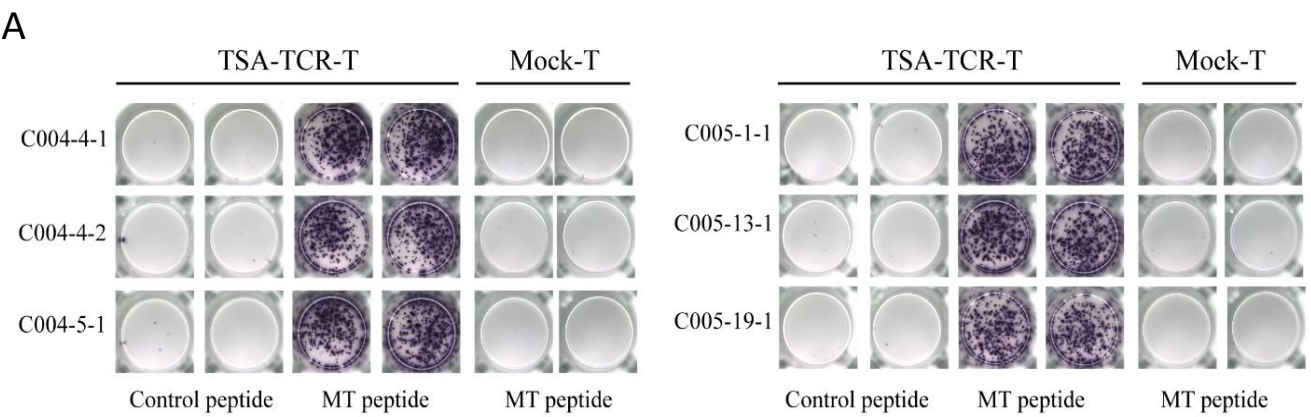

**Figure S2. Neoantigen-specific T cells of Neo-T products from patient C004 and C005.** (A). Functional validation of representative TSA-specific TCR clones from patient C004 and C005. IFN- $\gamma$  secreting cells were detected by ELISPOT assay. TSA, tumor specific antigen. Source data are provided as a Source Data file.

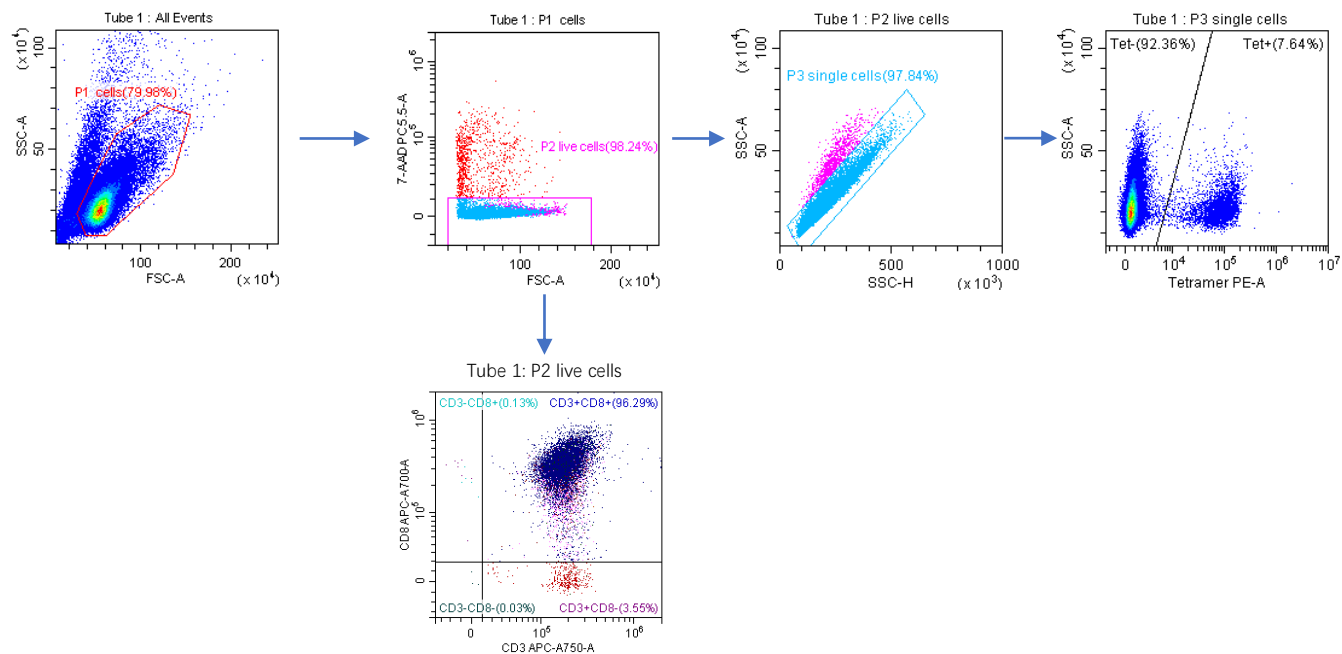

**Figure S3.** Representative images of flow cytometry analyses of Neo-Ts with gating. Results of CD8+T cell fraction were shown in Table s1, percentage of Tetramer+ cells were showed in Table S2. Source data are provided as a Source Data file.

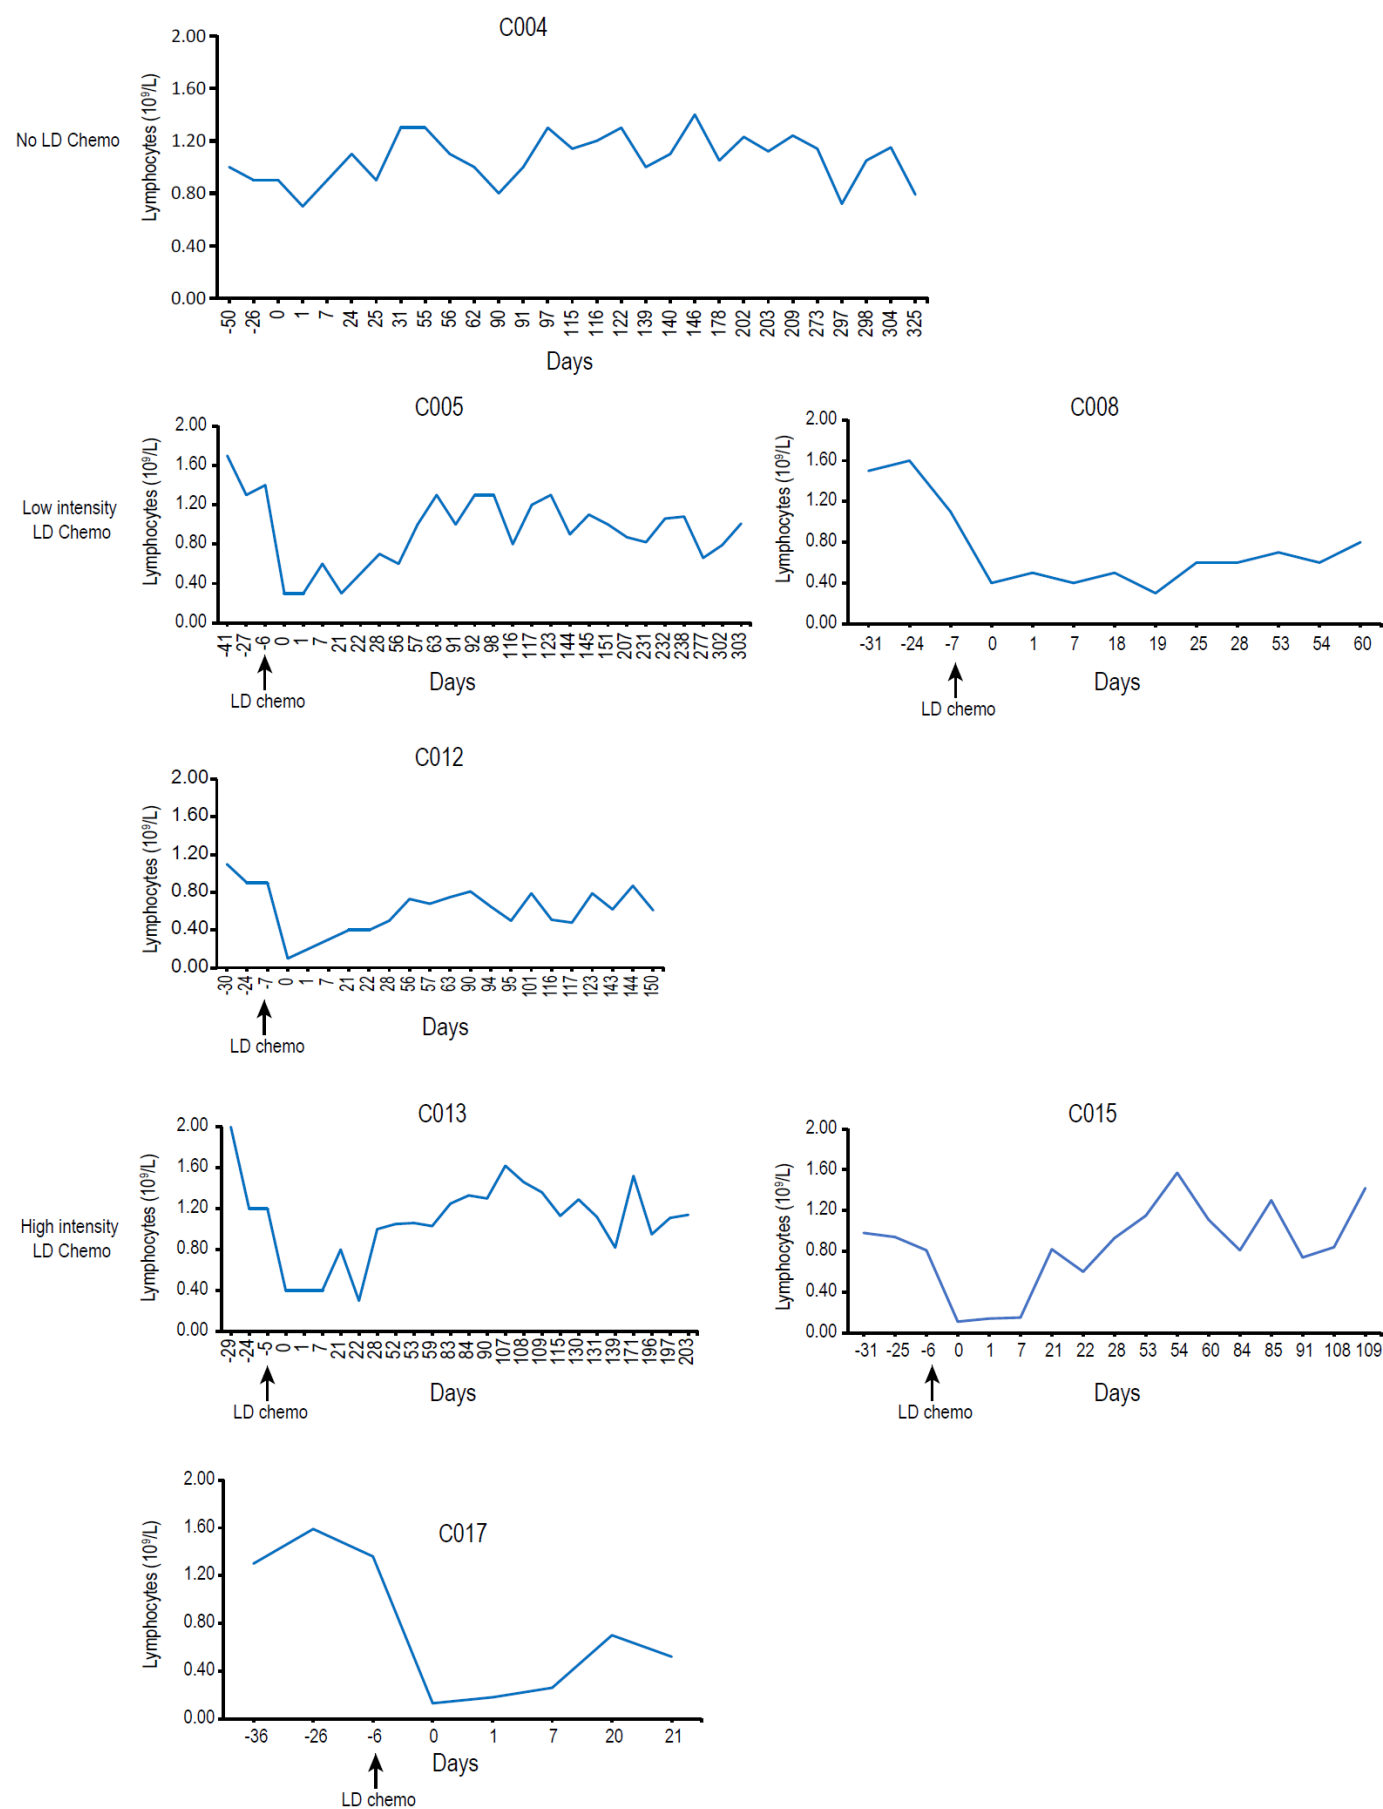

**Figure S4:** Total lymphocyte counts in different patients before and after lymphodepletion chemotherapy. Source data are provided as a Source Data file

Table S1. Characteristics of Neo-Ts Generated from All Patients

| Patient No. | #Nons Mutations | #Neoantigens used for Neo-Ts | #Average number of Neo-Ts (*10 <sup>7</sup> ) | Average Cell viability of Neo-Ts | Average fraction of CD8+T in Neo-Ts | Bacteria/fungus/mycoplasm a test of Neo-Ts |
|-------------|-----------------|------------------------------|-----------------------------------------------|----------------------------------|-------------------------------------|--------------------------------------------|
| C001        | 302             | 5                            | 4.78                                          | 0.96                             | 0.97                                | -/-/-                                      |
| C003        | 5471            | 9                            | 15.68                                         | 0.97                             | 0.90                                | -/-/-                                      |
| C004        | 838             | 13                           | 20.41                                         | 0.97                             | 0.97                                | -/-/-                                      |
| C005        | 2311            | 11                           | 9.67                                          | 0.97                             | 0.96                                | -/-/-                                      |
| C008        | 13024           | 8                            | 20.23                                         | 0.98                             | 0.93                                | -/-/-                                      |
| C012        | 3425            | 11                           | 10.37                                         | 0.99                             | 0.98                                | -/-/-                                      |
| C013        | 1921            | 15                           | 15.80                                         | 0.96                             | 0.98                                | -/-/-                                      |
| C015        | 529             | 12                           | 12.20                                         | 0.98                             | 1.00                                | -/-/-                                      |
| C017        | 47              | 8                            | 33.00                                         | 0.98                             | 0.97                                | -/-/-                                      |
| C018        | 41              | 8                            | 84                                            | 0.91                             | 0.97                                | -/-/-                                      |
| C020        | 179             | 20                           | 90                                            | 0.88                             | 0.99                                | -/-/-                                      |

Table S2. Ratio of Neoantigen specific T cells in Neo-Ts  
based on Tetramer analysis

| Patient#    |    | 003   |     | 004    |     | 005   |     | 008    |     | 012    |     | 013    |     | 015   |     | 017    |     | 020   |
|-------------|----|-------|-----|--------|-----|-------|-----|--------|-----|--------|-----|--------|-----|-------|-----|--------|-----|-------|
| neoantigens | #1 | 3.78% | #4  | 1.32%  | #1  | 1.29% | #1  | 0.22%  | #2  | 0.00%  | #3  | 32.13% | #4  | 0.06% | #1  | 0.00%  | #12 | 2.39% |
|             | #3 | 0.79% | #5  | 12.99% | #3  | 0.05% | #7  | 6.92%  | #3  | 0.48%  | #4  | 0.00%  | #9  | 0.11% | #2  | 0.00%  |     |       |
|             | #5 | 0.64% | #14 | 4.51%  | #7  | 1.06% | #13 | 5.42%  | #4  | 0.78%  | #6  | 0.00%  | #10 | 0.07% | #9  | 0.00%  |     |       |
|             | #8 | 0.24% | #16 | 0%     | #15 | 0.18% | #14 | 2.07%  | #6  | 0.00%  | #8  | 1.25%  | #11 | 0.04% | #10 | 0.01%  |     |       |
|             |    |       | #18 | 0.45%  | #16 | 1.49% | #15 | 4.77%  | #11 | 0.41%  | #10 | 0.00%  | #13 | 0.00% | #11 | 0.00%  |     |       |
|             |    |       |     |        | #19 | 0.45% | #16 | 1.14%  | #19 | 0.00%  | #12 | 0.00%  | #15 | 0.11% | #19 | 0.00%  |     |       |
|             |    |       |     |        |     |       | #17 | 1.35%  | #20 | 7.80%  | #14 | 0.00%  | #16 | 0.01% | #20 | 16.12% |     |       |
|             |    |       |     |        |     |       | #18 | 0.36%  | #23 | 15.80% | #19 | 0.00%  | #20 | 0.01% |     |        |     |       |
|             |    |       |     |        |     |       | #19 | 5.02%  |     |        | #22 | 10.53% | #22 | 0.00% |     |        |     |       |
|             |    |       |     |        |     |       | #20 | 1.34%  |     |        |     |        |     |       |     |        |     |       |
|             |    |       |     |        |     |       | #22 | 4.78%  |     |        |     |        |     |       |     |        |     |       |
| Total:      |    | 5.44% |     | 19.27% |     | 4.52% |     | 33.40% |     | 25.27% |     | 43.92% |     | 0.41% |     | 16.13% |     | 2.39% |

Table S3. List of Neoantigens Tested from patient C004 and C005.

| Peptide ID | Patient ID | Gene ID  | Mutation types | Protein change | Length (aa) | HLA allele (HLA-) | Mutated peptide |               | Wildtype peptide |               | Gene expression (TPM) | Frequency in tumor | Affinity through T2 assay (fI) |
|------------|------------|----------|----------------|----------------|-------------|-------------------|-----------------|---------------|------------------|---------------|-----------------------|--------------------|--------------------------------|
|            |            |          |                |                |             |                   | Sequence        | Affinity (nM) | Sequence         | Affinity (nM) |                       |                    |                                |
| C004-1     | C004       | RADIL    | SNV            | p.A689T        | 9           | A1101             | ATGEHFFQK       | 7.9           | AAGEHFFQK        | 28.5          | 1.68                  | 0.05               | 0.40                           |
| C004-2     | C004       | NNT      | SNV            | p.C44Y         | 9           | A1101             | YTHQELWYK       | 13.8          | YTHQELWCK        | 27.5          | 49.80                 | 0.05               | 0.27                           |
| C004-3     | C004       | SLC25A46 | INDEL          | -              | 9           | A1101             | LAFWSVLKK       | 14.6          | -                | -             | 74.64                 | 0.02               | 0.25                           |
| C004-4     | C004       | TTN      | INDEL          | -              | 9           | A1101             | SAWYTAINK       | 17.0          | -                | -             | 9.10                  | 0.02               | 2.44                           |
| C004-5     | C004       | SLC25A46 | INDEL          | -              | 9           | A1101             | ILAFWSVLK       | 17.0          | -                | -             | 74.64                 | 0.02               | 18.69                          |
| C004-9     | C004       | TCF25    | SNV            | p.V276M        | 9           | A1101             | MVLLQTSPY       | 34.9          | VVLLQTSPY        | 51.5          | 44.61                 | 0.07               | 0.55                           |
| C004-11    | C004       | SUSD2    | SNV            | p.R250W        | 9           | A1101             | GALWIIDSK       | 46.0          | GALRIIDSK        | 74.3          | 12.51                 | 0.05               | 0.46                           |
| C004-14    | C004       | TGFBRAP1 | SNV            | p.H725R        | 9           | A1101             | HTLLAIYLR       | 84.2          | HTLLAIYLH        | 50000.0       | 34.17                 | 0.05               | 19.89                          |
| C004-17    | C004       | GSTZ1    | SNV            | p.E32K         | 9           | A1101             | KTVPINLIK       | 12.2          | ETVPINLIK        | 63.4          | 16.11                 | 0.04               | 1.44                           |
| C004-18    | C004       | ZZEF1    | SNV            | p.D845A        | 9           | A1101             | ASVPMELK        | 12.4          | DSVPMELK         | 50000.0       | 27.76                 | 0.04               | 0.94                           |
| C004-21    | C004       | AKAP6    | SNV            | p.Q762H        | 9           | A1101             | ATKSALIHK       | 15.5          | ATKSALIQK        | 16.8          | 5.29                  | 0.05               | 4.69                           |
| C004-22    | C004       | NPAT     | SNV            | p.V575I        | 9           | A1101             | SSDSSEIHK       | 18.6          | SSDSSEVHK        | 29.5          | 40.81                 | 0.04               | 0.63                           |
| C004-23    | C004       | IGBP1    | INDEL          | -              | 9           | A1101             | AAGSRTLK        | 19.3          | -                | -             | 34.90                 | 0.04               | 1.40                           |
| C005-1     | C005       | PAQR6    | SNV            | p.P92L         | 9           | A0201             | FLLPACLYL       | 3.6           | FLLPACLYP        | 56.0          | 4.92                  | 0.10               | 1.44                           |
| C005-3     | C005       | ATG9A    | SNV            | p.A124V        | 9           | A0201             | FLPAQVCSV       | 4.2           | FLPAQVCSA        | 15.2          | 19.99                 | 0.17               | 1.38                           |
| C005-7     | C005       | NCAPG2   | SNV            | p.P388S        | 9           | A0201             | SLLEDSPYM       | 5.1           | SLLEDPPYM        | 5.9           | 24.43                 | 0.14               | 0.73                           |
| C005-12    | C005       | ST5      | SNV            | p.G1024E       | 9           | A0201             | TLNELVSEV       | 10.4          | TLNGLVSEV        | 13.9          | 52.33                 | 0.21               | 1.58                           |
| C005-13    | C005       | TXNIP    | SNV            | p.G266D        | 9           | A0201             | ILDCNLRV        | 10.5          | ILGCNLRV         | 16.0          | 364.07                | 0.08               | 2.73                           |
| C005-14    | C005       | KDM4A    | SNV            | p.P870S        | 9           | A0201             | MQSDDWPFV       | 11.4          | MQPDDWPFV        | 22.0          | 23.87                 | 0.06               | 1.15                           |
| C005-15    | C005       | IDH3B    | SNV            | p.E124K        | 9           | A0201             | KLASYDMRL       | 12.1          | ELASYDMRL        | 164.3         | 28.88                 | 0.05               | 0.79                           |
| C005-16    | C005       | ERBIN    | SNV            | p.S274L        | 9           | A0201             | GLLKNITTL       | 12.7          | GSLKNITTL        | 50000.0       | 98.36                 | 0.05               | 1.59                           |
| C005-19    | C005       | ZSWIM8   | SNV            | p.A85T         | 9           | A0201             | VTFHIPFEV       | 15.5          | VAFHIPFEV        | 41.1          | 20.10                 | 0.06               | 1.23                           |
| C005-25    | C005       | SPIN3    | SNV            | p.P156S        | 9           | A0201             | SVMNTWFYI       | 11.5          | PVMNTWFYI        | 50000.0       | 10.66                 | 0.10               | 2.96                           |
| C005-29    | C005       | ANOS1    | SNV            | p.P613L        | 9           | A0201             | ILLSHDYVL       | 19.0          | ILPSDHYVL        | 51.3          | 7.42                  | 0.33               | 2.79                           |

## Supplementary Note

### Clinical Study Protocol Synopsis

|                                   |                                                                                                                                                                                                                                                                                                                                                                                                                                                                                                                                                                                                                                                                                                                                                                                                                                                                                                                                                                                                                                                                                                                                                                                                                                                                                                                                                                                                                                                                                                                                                                                                                                                                                                                                                                                                                                                                                       |
|-----------------------------------|---------------------------------------------------------------------------------------------------------------------------------------------------------------------------------------------------------------------------------------------------------------------------------------------------------------------------------------------------------------------------------------------------------------------------------------------------------------------------------------------------------------------------------------------------------------------------------------------------------------------------------------------------------------------------------------------------------------------------------------------------------------------------------------------------------------------------------------------------------------------------------------------------------------------------------------------------------------------------------------------------------------------------------------------------------------------------------------------------------------------------------------------------------------------------------------------------------------------------------------------------------------------------------------------------------------------------------------------------------------------------------------------------------------------------------------------------------------------------------------------------------------------------------------------------------------------------------------------------------------------------------------------------------------------------------------------------------------------------------------------------------------------------------------------------------------------------------------------------------------------------------------|
| Title                             | Phase I Clinical Trial of TSA-CTL (Tumor Specific Antigen-Induced Cytotoxic T Lymphocytes) In the Treatment of Advanced Solid Tumors                                                                                                                                                                                                                                                                                                                                                                                                                                                                                                                                                                                                                                                                                                                                                                                                                                                                                                                                                                                                                                                                                                                                                                                                                                                                                                                                                                                                                                                                                                                                                                                                                                                                                                                                                  |
| Enrollment                        | 24                                                                                                                                                                                                                                                                                                                                                                                                                                                                                                                                                                                                                                                                                                                                                                                                                                                                                                                                                                                                                                                                                                                                                                                                                                                                                                                                                                                                                                                                                                                                                                                                                                                                                                                                                                                                                                                                                    |
| Site                              | Sun Yat-sen University Cancer Center                                                                                                                                                                                                                                                                                                                                                                                                                                                                                                                                                                                                                                                                                                                                                                                                                                                                                                                                                                                                                                                                                                                                                                                                                                                                                                                                                                                                                                                                                                                                                                                                                                                                                                                                                                                                                                                  |
| Study Phase                       | Phase I (Investigator-initiated trial)                                                                                                                                                                                                                                                                                                                                                                                                                                                                                                                                                                                                                                                                                                                                                                                                                                                                                                                                                                                                                                                                                                                                                                                                                                                                                                                                                                                                                                                                                                                                                                                                                                                                                                                                                                                                                                                |
| Study Objectives                  | 1.Primary objective: to evaluate the safety of TSA-CTL in the treatment of advanced solid tumors.<br>2.Secondary objective: to evaluate preliminarily the efficacy of TSA-CTL in the treatment of advanced solid tumors.                                                                                                                                                                                                                                                                                                                                                                                                                                                                                                                                                                                                                                                                                                                                                                                                                                                                                                                                                                                                                                                                                                                                                                                                                                                                                                                                                                                                                                                                                                                                                                                                                                                              |
| Conditions                        | Advanced solid tumors                                                                                                                                                                                                                                                                                                                                                                                                                                                                                                                                                                                                                                                                                                                                                                                                                                                                                                                                                                                                                                                                                                                                                                                                                                                                                                                                                                                                                                                                                                                                                                                                                                                                                                                                                                                                                                                                 |
| Study Drug                        | TSA-CTL (Tumor Specific Antigen-Induced Cytotoxic T Lymphocytes)                                                                                                                                                                                                                                                                                                                                                                                                                                                                                                                                                                                                                                                                                                                                                                                                                                                                                                                                                                                                                                                                                                                                                                                                                                                                                                                                                                                                                                                                                                                                                                                                                                                                                                                                                                                                                      |
| Dose and Method of Administration | 5x10 <sup>7</sup> ~1.2x10 <sup>9</sup> cells, intravenous infusion                                                                                                                                                                                                                                                                                                                                                                                                                                                                                                                                                                                                                                                                                                                                                                                                                                                                                                                                                                                                                                                                                                                                                                                                                                                                                                                                                                                                                                                                                                                                                                                                                                                                                                                                                                                                                    |
| Study Design                      | <p>This is a single arm, open label and non-randomized clinical study with two parts.</p> <p>In Part 1, 9 subjects with advanced solid tumors will be enrolled into Groups A (no non-myeloablative lymphodepletion), B and C (non-myeloablative lymphodepletion with different chemotherapy intensities) to assess the safety and dose intensity of non-myeloablative lymphodepletion chemotherapy before cell infusion. In Group A, subjects No. 1, 2 and 3 will receive 6 infusions of 5x10<sup>7</sup>, 1x10<sup>8</sup>, and 2x10<sup>8</sup> cells, respectively. Treatment of subject No. 2 will begin after safety evaluation of subject No.1. Doses of TSA-CTL cell infusions in subsequent subjects will be determined after safety evaluation of subjects No. 1-3.</p> <p>Depending on results in Part 1, the study may proceed to Part 2, where 15 subjects with advanced solid tumors will be enrolled to receive TSA-CTL cell infusions with or without non-myeloablative lymphodepletion.</p> <p><u>Group A:</u><br/>No lymphodepletion. Patients will receive TSA-CTL iv over 20-30 minutes on day 0.</p> <p><u>Group B:</u><br/>Patients will receive a low-dose lymphodepletion regimen consisting of cyclophosphamide and fludarabine followed by TSA-CTL.<br/>TSA-CTL: iv over 20-30 minutes on day 0.<br/>Cyclophosphamide: 500 mg/m<sup>2</sup>/day iv on day -5 for one day.<br/>Fludarabine: 25 mg/m<sup>2</sup>/day iv over 30 minutes on day -5 and -4 for two days.</p> <p><u>Group C:</u><br/>Patients will receive a medium-dose lymphodepletion regimen consisting of cyclophosphamide and fludarabine followed by TSA-CTL.<br/>TSA-CTL: iv over 20-30 minutes on day 0.<br/>Cyclophosphamide: 500 mg/m<sup>2</sup>/day iv on day -5 and -4 for two days.<br/>Fludarabine: 25 mg/m<sup>2</sup>/day iv over 30 minutes on day -5 and -4 for two days.</p> |



|                       |                                                                                                                                                                                                                                                                                                                                                                                                                                                                                                                                                                                                                                                                                                                                                                                                                                                                                                                                                                                                                                                                                                                                                                                                                                                                                                                                                                                                                                                                                                                                                                                                                                                                                                                                                                                                                                                                                                                                                                                                                                                                                                                                                                                                                                                                                                                                                                                                                                                                                            |
|-----------------------|--------------------------------------------------------------------------------------------------------------------------------------------------------------------------------------------------------------------------------------------------------------------------------------------------------------------------------------------------------------------------------------------------------------------------------------------------------------------------------------------------------------------------------------------------------------------------------------------------------------------------------------------------------------------------------------------------------------------------------------------------------------------------------------------------------------------------------------------------------------------------------------------------------------------------------------------------------------------------------------------------------------------------------------------------------------------------------------------------------------------------------------------------------------------------------------------------------------------------------------------------------------------------------------------------------------------------------------------------------------------------------------------------------------------------------------------------------------------------------------------------------------------------------------------------------------------------------------------------------------------------------------------------------------------------------------------------------------------------------------------------------------------------------------------------------------------------------------------------------------------------------------------------------------------------------------------------------------------------------------------------------------------------------------------------------------------------------------------------------------------------------------------------------------------------------------------------------------------------------------------------------------------------------------------------------------------------------------------------------------------------------------------------------------------------------------------------------------------------------------------|
| Inclusion<br>Criteria | <p>1. Greater than or equal to 18 years of age and less than or equal to 70 years of age; all genders.</p> <p>2. Advanced solid tumors including but not limited to some high frequency somatic mutations, such as melanoma, colorectal cancer, gastric cancer, esophageal cancer, squamous cell carcinoma of the lung, triple-negative breast cancer, etc.</p> <p>3. Advanced solid tumors patients who are HLA - A0201 /A1101/A2402 subtypes.</p> <p>4. Measurable solid tumors with at least one lesion that is resectable or tumor biopsies for DNA extraction.</p> <p>5. Patients who failed or were intolerant to standard treatment.</p> <p>6. Patients (or their legal representatives) who are able to understand and sign the Informed Consent Form and willing to sign a durable power of attorney.</p> <p>7. Clinical performance status of ECOG is 0 or 1 and expected lifetime is greater than six month and patients who are able to cooperate to observe adverse reactions and the effect of the treatment.</p> <p>8. Patients of both genders must be willing to practice birth control from the time of enrollment to five months after treatment on this study.</p> <p>9. Serology: HIV antibody(-), hepatitis B antigen(-), and hepatitis C antibody(-). A fertile woman must have a negative pregnancy test. Hematology: Absolute neutrophil count is greater than 1500/mm<sup>3</sup> without the support of filgrastim; WBC is greater than or equal to 3000/mm<sup>3</sup>; lymphocyte count is greater than or equal to 800/mm<sup>3</sup>; Platelet count is greater than or equal to 100,000/mm<sup>3</sup>; Hemoglobin is greater than or equal to 9.0 g/dL ; Chemistry: Serum ALT/AST is less than or equal to 2.5 times the upper limit of normal; Serum Creatinine is less than or equal to 1.5 times the upper limit of normal ; Total bilirubin is less than or equal to 1.5 the upper limit of normal, except in patients with Gilbert's Syndrome who must have a total bilirubin less than 3 times the upper limit of normal.</p> <p>10. More than four weeks must have elapsed since any prior systemic therapy at the time the patient receives the lymphodepletion regimen, and toxicities must have recovered to grade 1 or less (except for toxicities such as alopecia or vitiligo).</p> <p>Note: Patients may have undergone minor surgical procedures within the past 3 weeks, as long as all toxicities have recovered to grade 1 or less.</p> |
|-----------------------|--------------------------------------------------------------------------------------------------------------------------------------------------------------------------------------------------------------------------------------------------------------------------------------------------------------------------------------------------------------------------------------------------------------------------------------------------------------------------------------------------------------------------------------------------------------------------------------------------------------------------------------------------------------------------------------------------------------------------------------------------------------------------------------------------------------------------------------------------------------------------------------------------------------------------------------------------------------------------------------------------------------------------------------------------------------------------------------------------------------------------------------------------------------------------------------------------------------------------------------------------------------------------------------------------------------------------------------------------------------------------------------------------------------------------------------------------------------------------------------------------------------------------------------------------------------------------------------------------------------------------------------------------------------------------------------------------------------------------------------------------------------------------------------------------------------------------------------------------------------------------------------------------------------------------------------------------------------------------------------------------------------------------------------------------------------------------------------------------------------------------------------------------------------------------------------------------------------------------------------------------------------------------------------------------------------------------------------------------------------------------------------------------------------------------------------------------------------------------------------------|

|                         |                                                                                                                                                                                                                                                                                                                                                                                                                                                                                                                                                                                                                                                                                                                                                                                                                                                                                                                                                                                                                                                                                                                             |
|-------------------------|-----------------------------------------------------------------------------------------------------------------------------------------------------------------------------------------------------------------------------------------------------------------------------------------------------------------------------------------------------------------------------------------------------------------------------------------------------------------------------------------------------------------------------------------------------------------------------------------------------------------------------------------------------------------------------------------------------------------------------------------------------------------------------------------------------------------------------------------------------------------------------------------------------------------------------------------------------------------------------------------------------------------------------------------------------------------------------------------------------------------------------|
| Exclusion Criteria      | <ol style="list-style-type: none"> <li>1. Pregnant or lactating women.</li> <li>2. Any primary immunodeficiency (such as Severe Combined Immunodeficiency Disease).</li> <li>3. Opportunistic infection</li> <li>4. History of autoimmune disease.</li> <li>5. Active systemic infections, coagulation disorders or other active major medical illnesses of the cardiovascular, respiratory or immune system.</li> <li>6. Systemic steroid therapy in the past 4 weeks.</li> <li>7. History of severe immediate hypersensitivity reaction to any of the agents used in this study.</li> <li>8. Patients with unstable brain metastases.</li> <li>9. Choroidal melanoma and clear cell sarcoma patients.</li> <li>10. Negative for expression of MHC molecules.</li> </ol>                                                                                                                                                                                                                                                                                                                                                   |
| Outcome Measures        | <p>Primary Outcome Measure: number of participants with adverse events, as assessed by CTCAE v5.0, within 30 days after the first infusion.</p> <p>Secondary Outcome Measures:</p> <ol style="list-style-type: none"> <li>1. Disease Control Rate (DCR): proportion of participants with tumor size reduction (CR, PR) and stable disease (SD) assessed by RECIST 1.1 and iRECIST.</li> <li>2. Overall survival (OS): time from the first infusion of Investigational Product until death.</li> <li>3. Progression-free survival (PFS): time from the first infusion of Investigational Product until objective tumor progression, as assessed by RECIST 1.1 and iRECIST, or death, whichever occurs first.</li> <li>4. Duration of Response (DOR) refers to the period from the first evaluation of tumor as CR or PR to the first evaluation as PD (Progressive Disease) per RECIST1.1 and iRECIST.</li> </ol>                                                                                                                                                                                                            |
| Statistic analysis plan | <p><b><u>Analysis datasets</u></b></p> <p>Full Analysis Set (FAS): All subjects who sign an informed consent form, are enrolled and receive at least one dose of study treatment.</p> <p>Per-Protocol Set (PPS): Subjects who receive at least one dose of study treatment in FAS and have at least one post-baseline tumor assessment. PPS is a secondary efficacy analysis dataset.</p> <p>Safety Set (SS): All subjects who are enrolled and receive at least one dose of study treatment.</p> <p><b><u>Efficacy analysis</u></b></p> <p>Efficacy analysis will be based on FAS. PPS analysis is secondary to FAS. Objective tumor imaging data will be evaluated by investigators according to RECIST1.1 (main analysis) and iRECIST.</p> <p><b><u>Safety analysis</u></b></p> <p>Safety analysis is based on SS, ie, a descriptive analysis of safety data among treated subjects in each cohort/treatment group and overall.</p> <p>Descriptive summary statistics (eg, mean, standard deviation, median, minimum and maximum) of laboratory findings, vital signs and ECG parameters, and changes from baseline.</p> |

|  |                                                                                                                                                                                                                                                                                                                                                                                                   |
|--|---------------------------------------------------------------------------------------------------------------------------------------------------------------------------------------------------------------------------------------------------------------------------------------------------------------------------------------------------------------------------------------------------|
|  | <p>Only treatment-emergent adverse events (TEAEs) will be pooled and analyzed. TEAEs will be statistically described, including the number and percentage of subjects, based on SS in each cohort/treatment group and overall. All adverse events will be listed in the data table. The incidence of TEAEs will be summarized by SOC, PT, CTCAE grade, and relationship with study treatment.</p> |
|--|---------------------------------------------------------------------------------------------------------------------------------------------------------------------------------------------------------------------------------------------------------------------------------------------------------------------------------------------------------------------------------------------------|
